# Supplementary material for: Metabolites Produced by the Oral Commensal Bacterium Corynebacterium durum Extend the Lifespan of Caenorhabditis elegans via SIR-2.1 Overexpression
Source: PubMed Central journal article supplement (PMC7139712; doi:10.3390/ijms21062212), 2020-03-23
Supplement: ijms-21-02212-s001.pdf [file ijms-21-02212-s001.pdf]

| Figure No. | Contents                                                                                                          | Page |
|------------|-------------------------------------------------------------------------------------------------------------------|------|
| Figure S1  | <sup>1</sup> H NMR spectrum of N-APEA isolated from <i>Corynebacterium durum</i>                                  | S3   |
| Figure S2  | <sup>1</sup> H NMR spectrum of N-ATRA isolated from <i>Corynebacterium durum</i>                                  | S4   |
| Figure S3  | <sup>1</sup> H NMR spectrum of TRA isolated from <i>Corynebacterium durum</i>                                     | S5   |
| Figure S4  | <sup>1</sup> H NMR spectrum of TA isolated from <i>Corynebacterium durum</i>                                      | S6   |
| Figure S5  | <sup>1</sup> H NMR spectrum of synthesized N-APEA                                                                 | S7   |
| Figure S6  | <sup>1</sup> H NMR spectrum of synthesized N-ATRA                                                                 | S8   |
| Figure S7  | <sup>1</sup> H NMR spectrum of synthesized N-ATA                                                                  | S9   |
| Figure S8  | DPPH radical scavenging activity of the three monoamines TA, PEA, and TRA and their <i>N</i> -acetyl derivatives. | S10  |

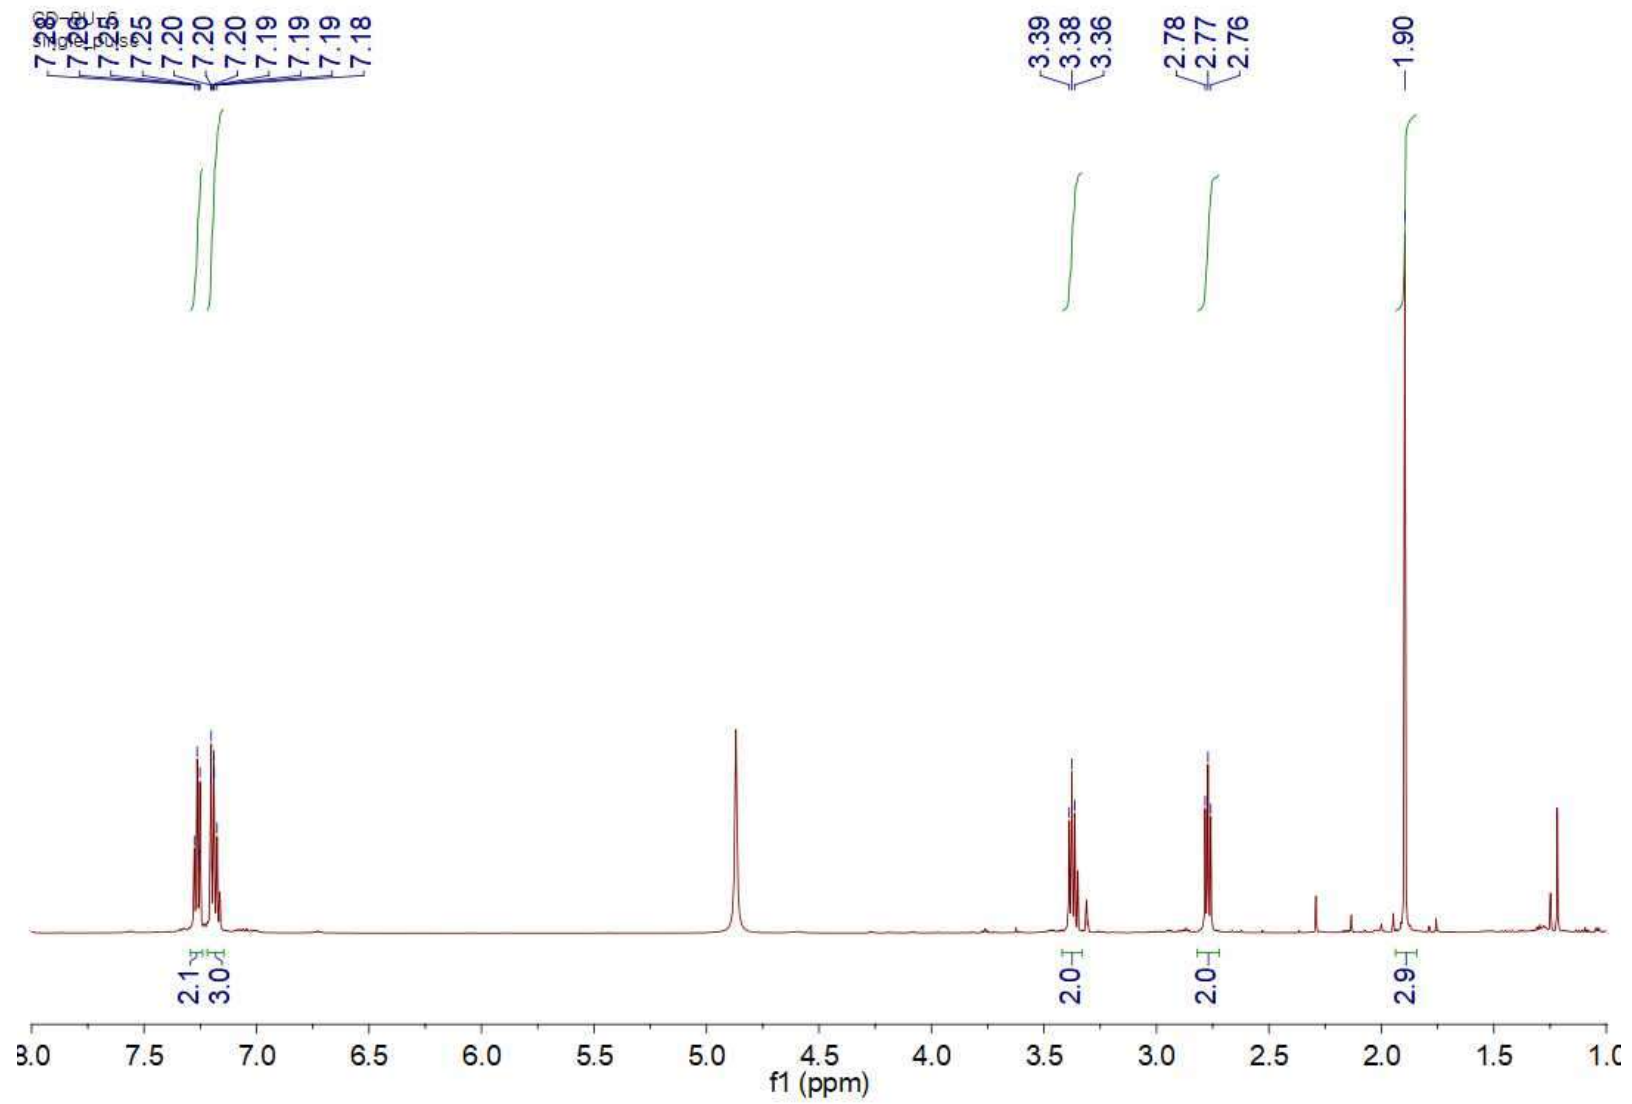

Figure S1. <sup>1</sup>H NMR spectrum of N-APEA isolated from *Corynebacterium durum*.

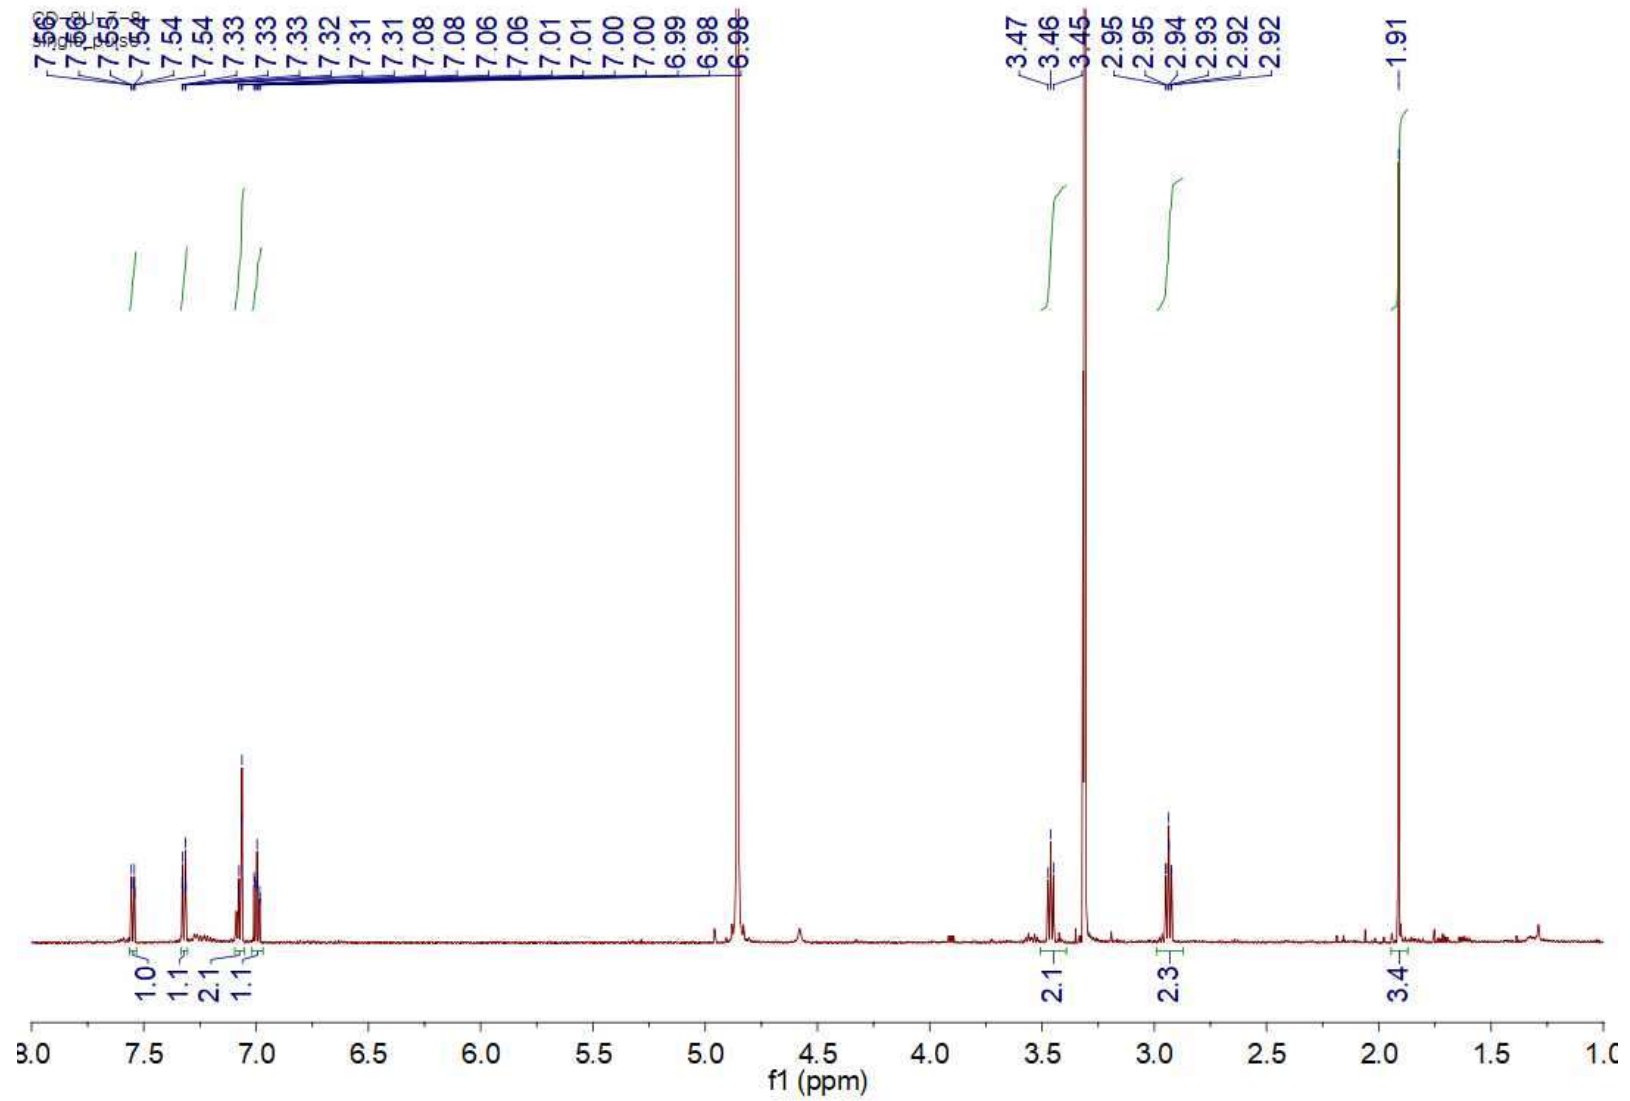

Figure S2. <sup>1</sup>H NMR spectrum of N-ATRA isolated from *Corynebacterium durum*

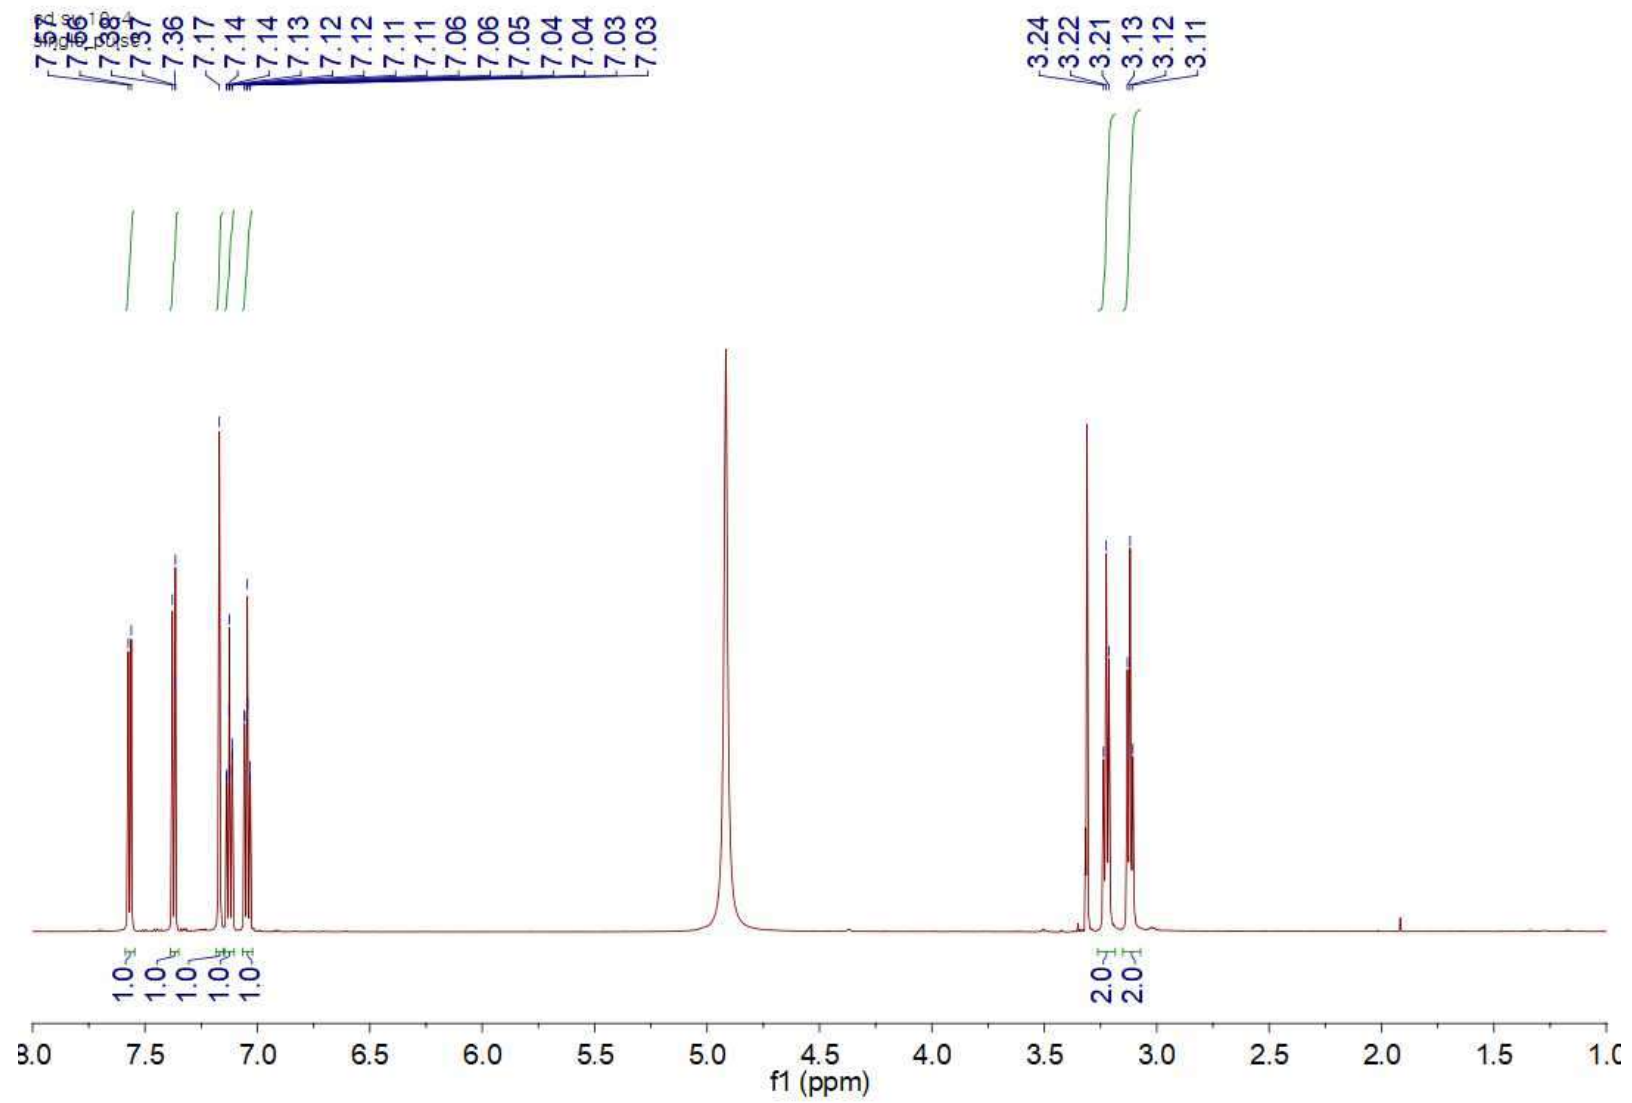

Figure S3.  $^1\text{H}$  NMR spectrum of TRA isolated from *Corynebacterium durum*

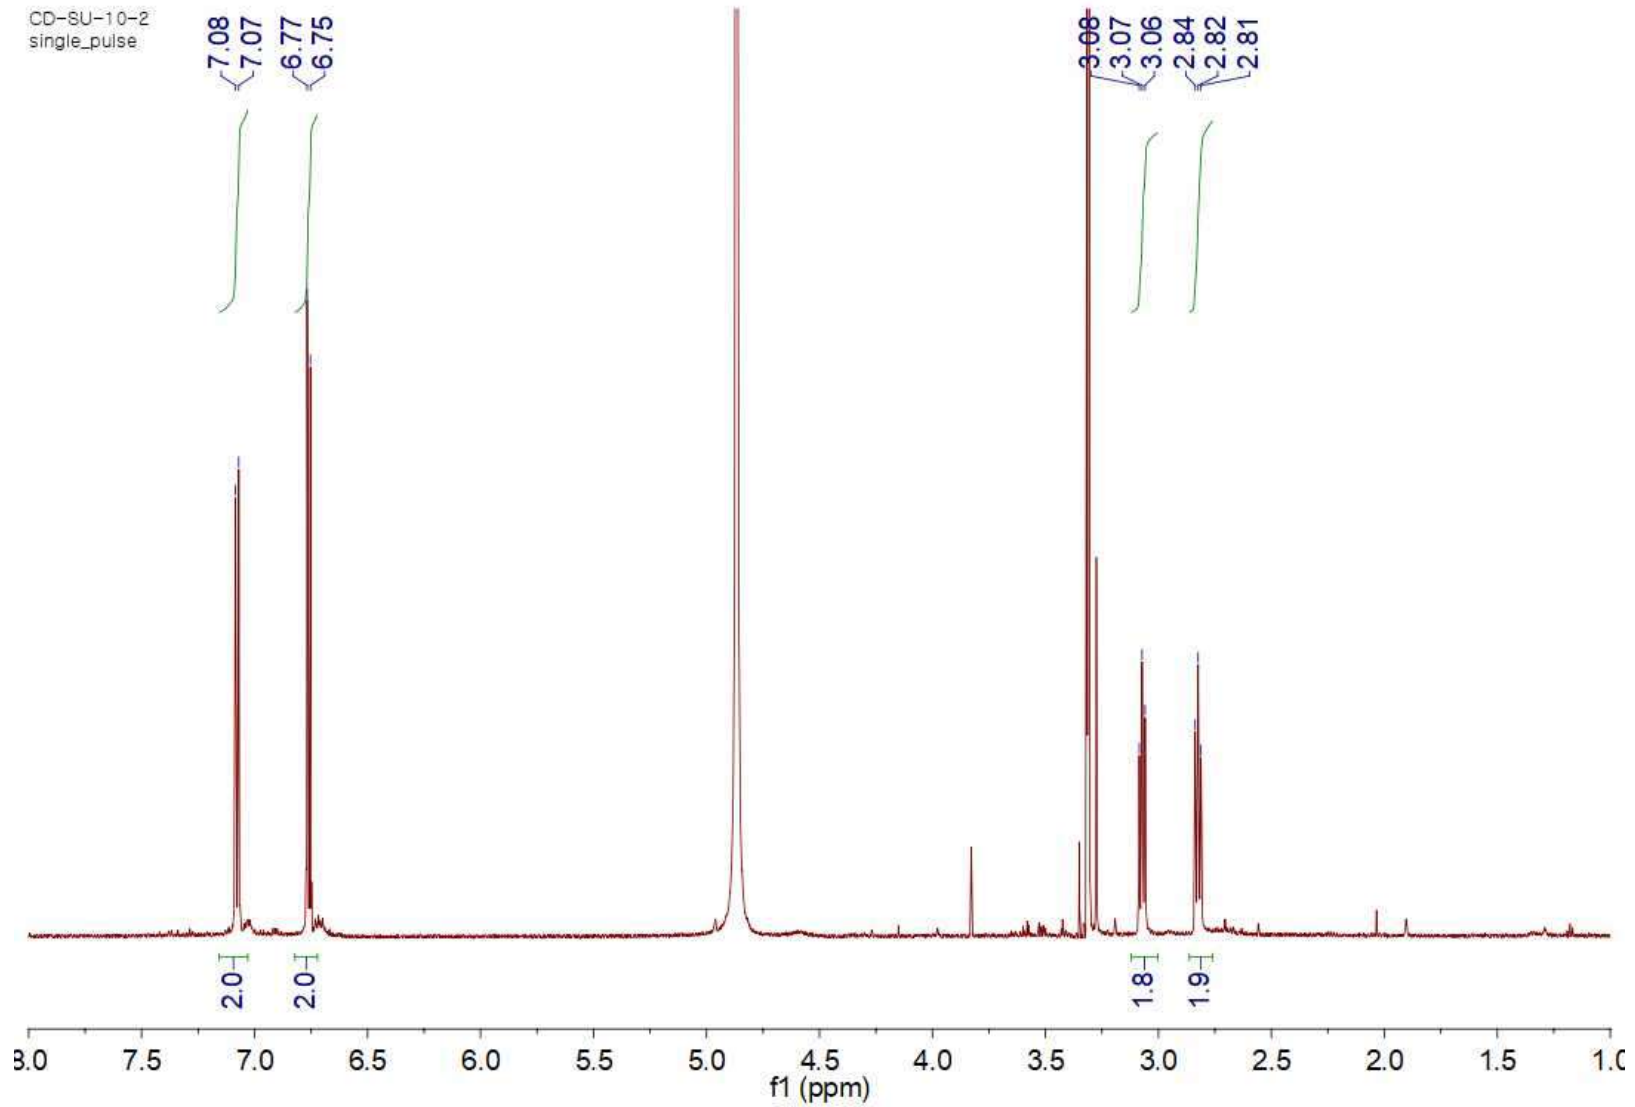

Figure S4.  $^1\text{H}$  NMR spectrum of TA isolated from *Corynebacterium durum*

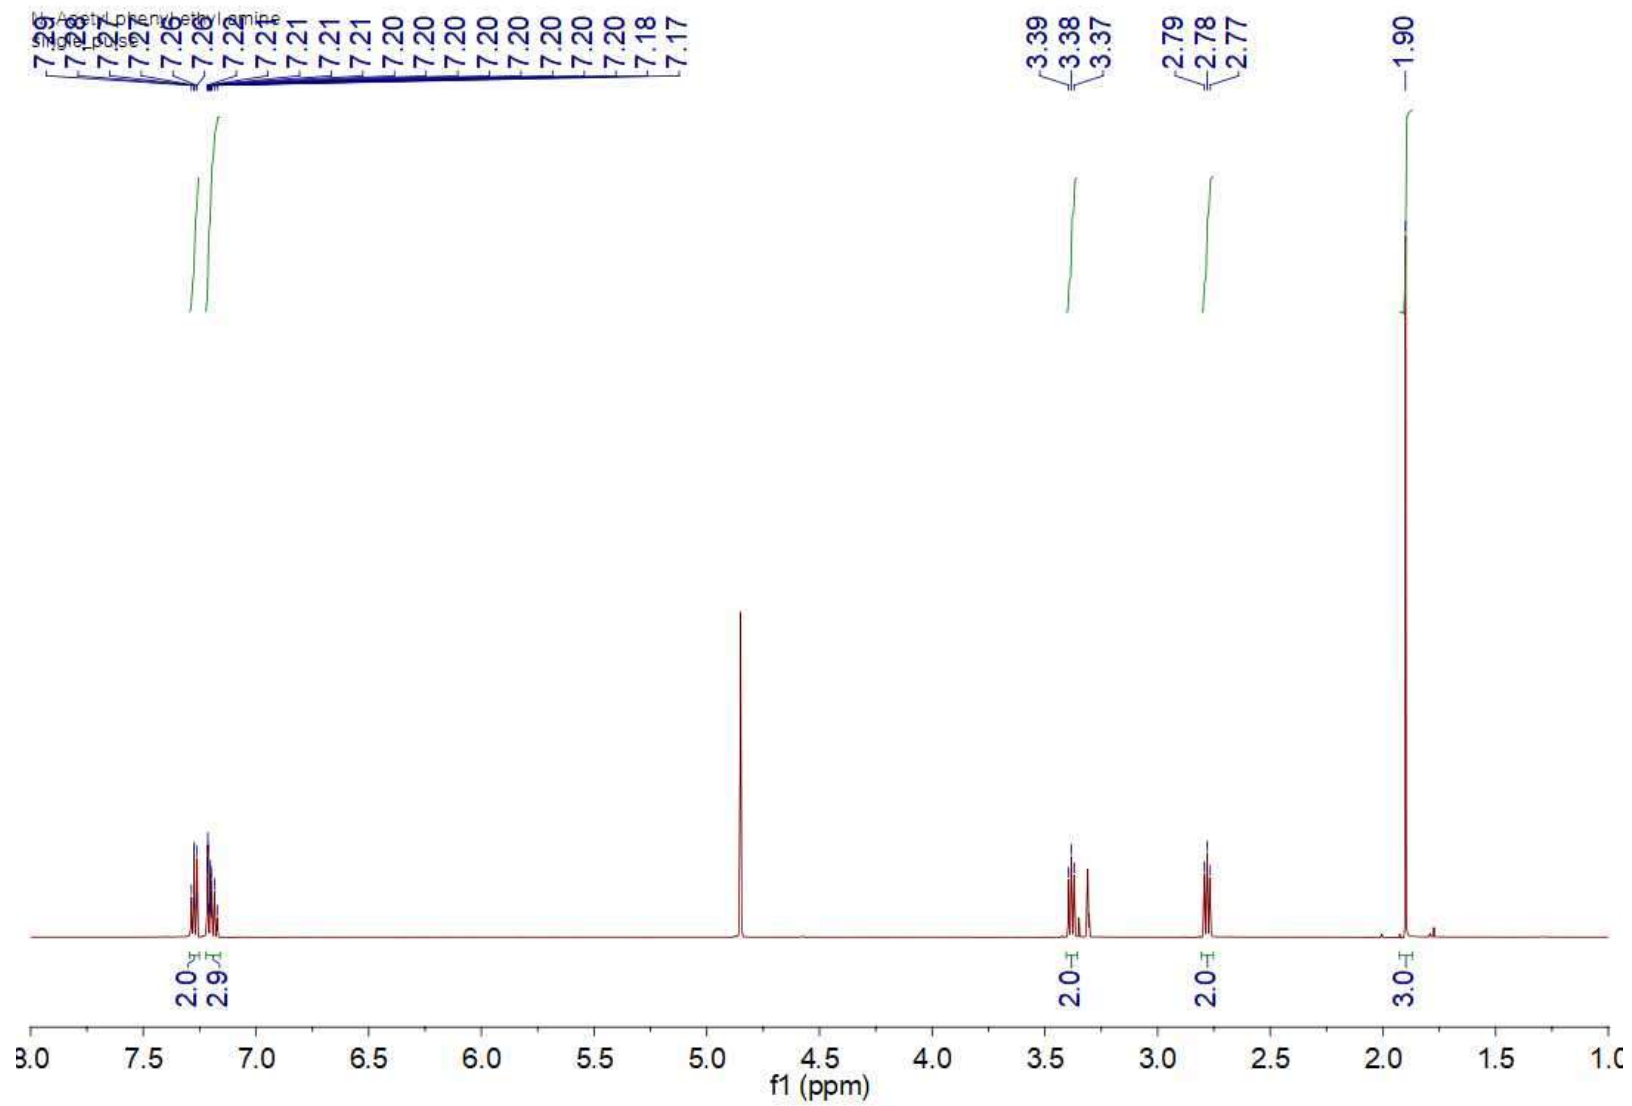

Figure S5.  $^1\text{H}$  NMR spectrum of synthesized N-APEA.

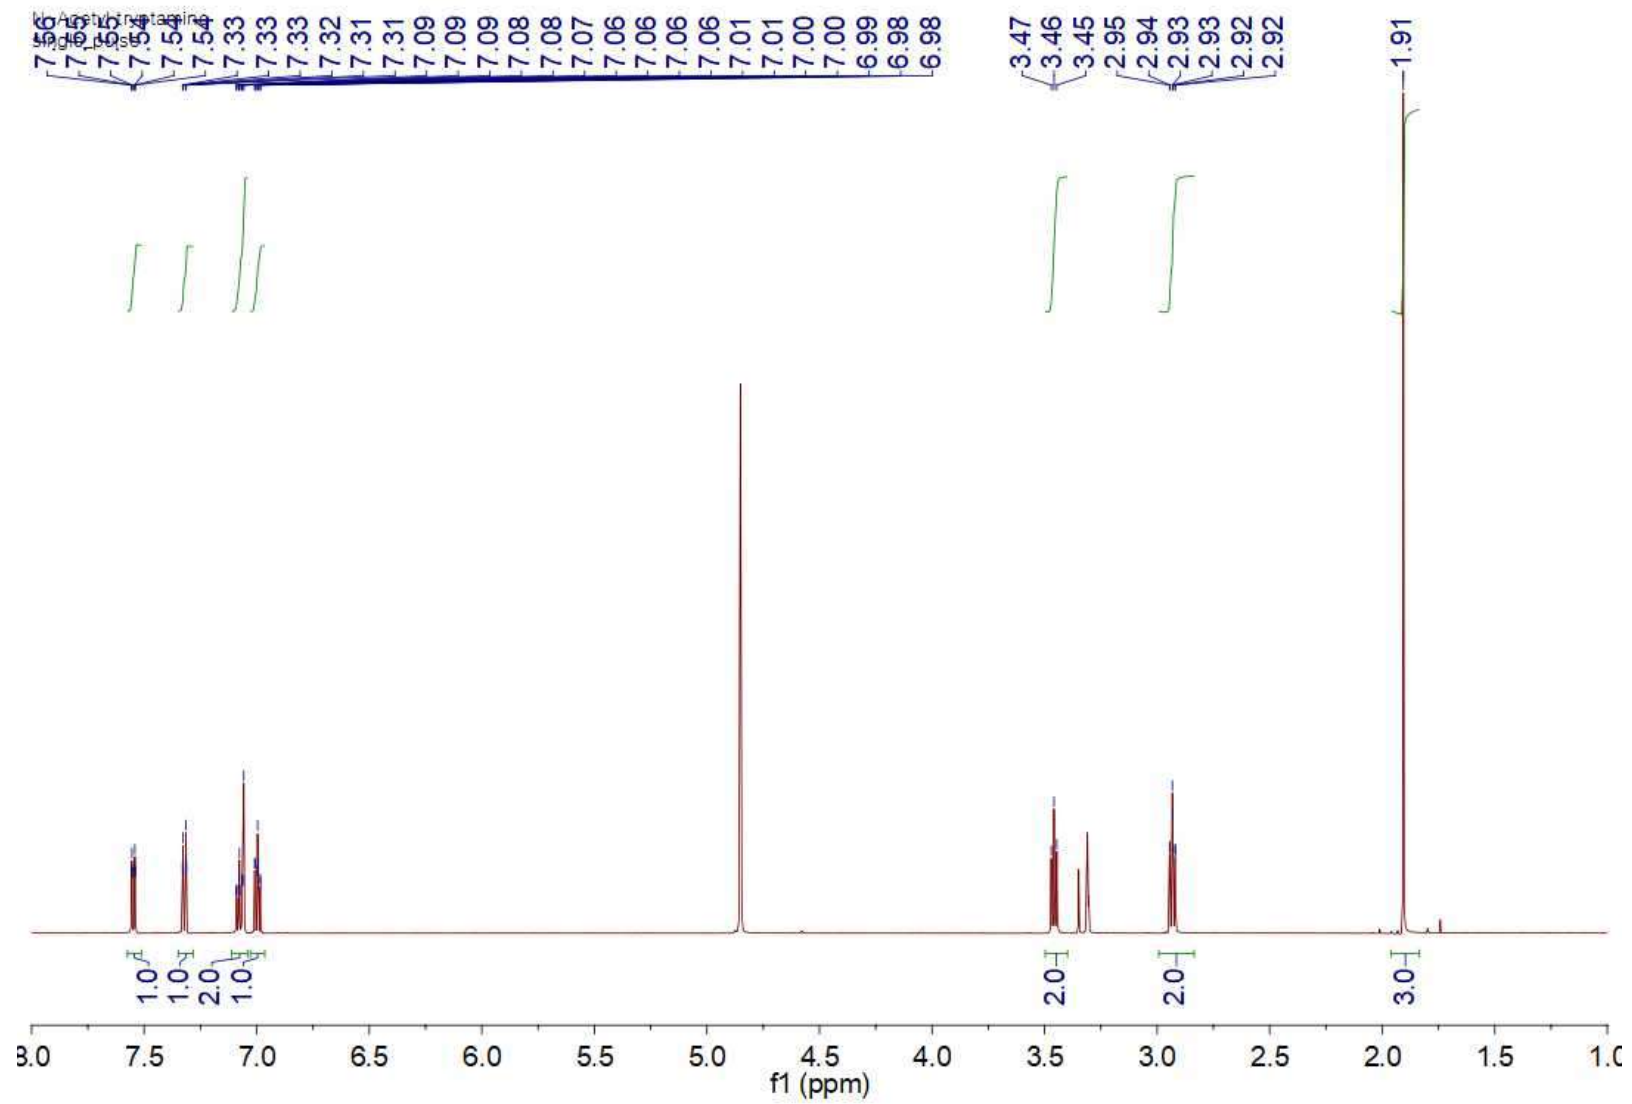

Figure S6. <sup>1</sup>H NMR spectrum of synthesized N-ATRA.

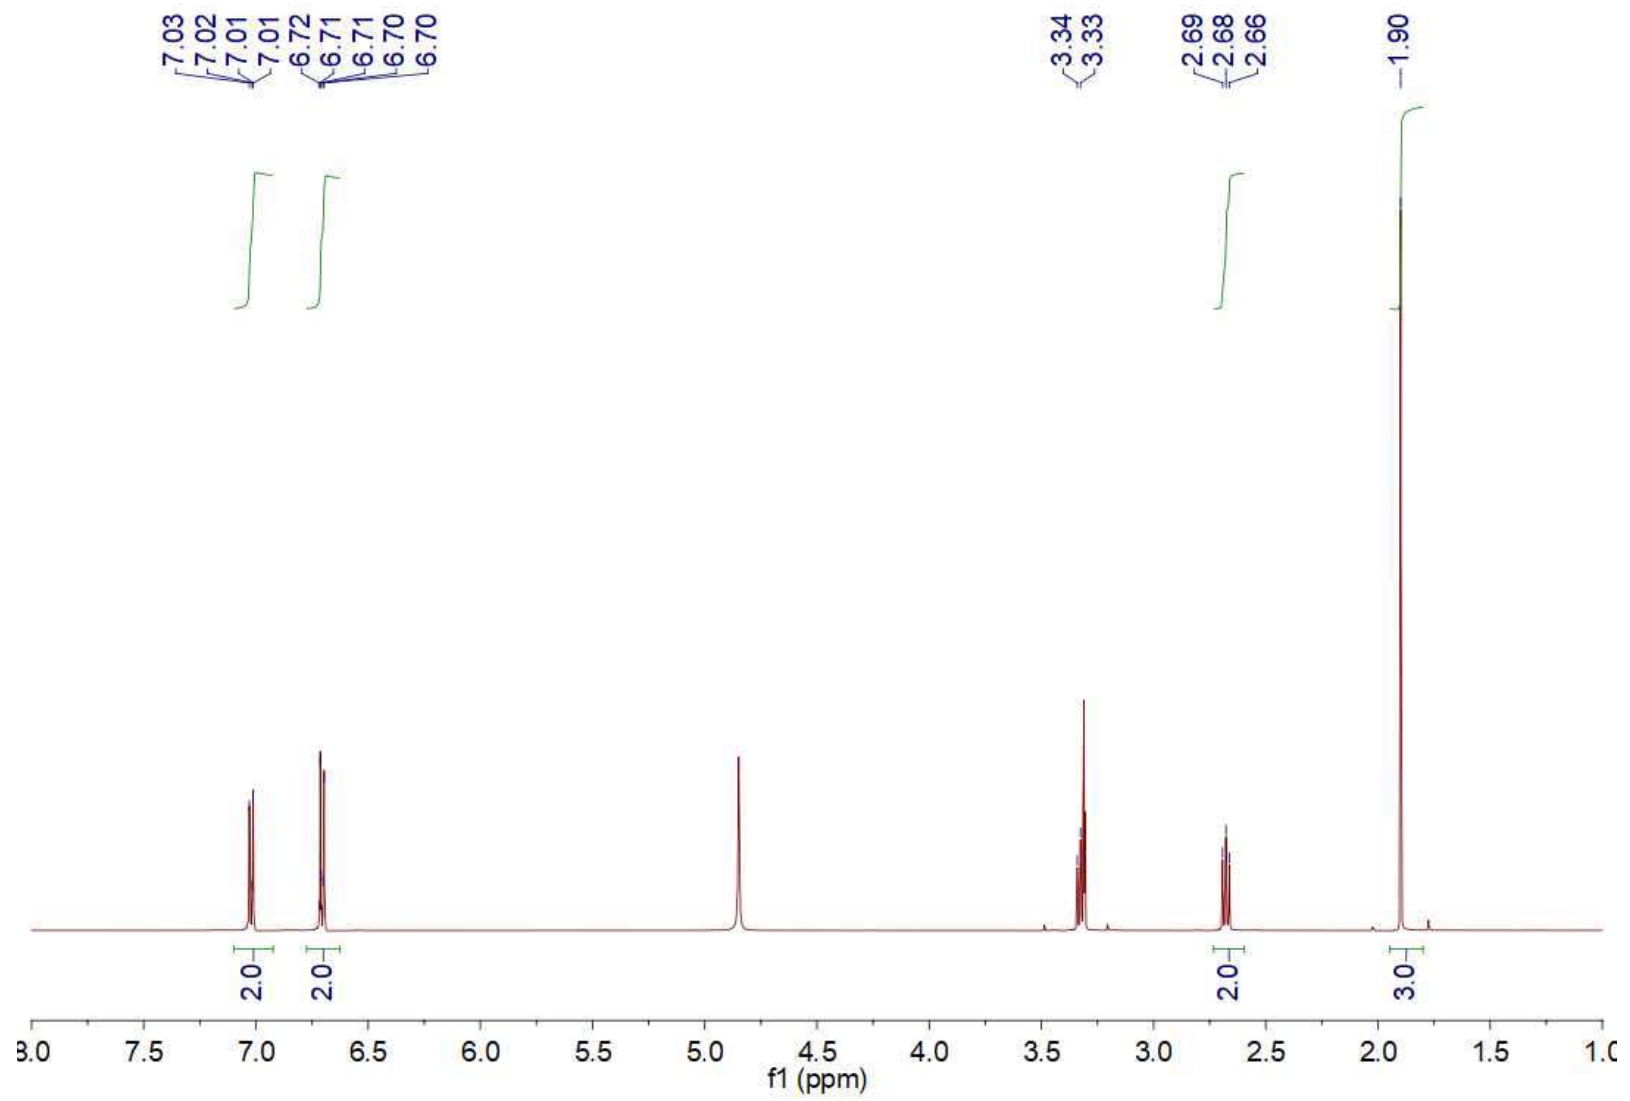

Figure S7.  $^1\text{H}$  NMR spectrum of synthesized N-ATA.



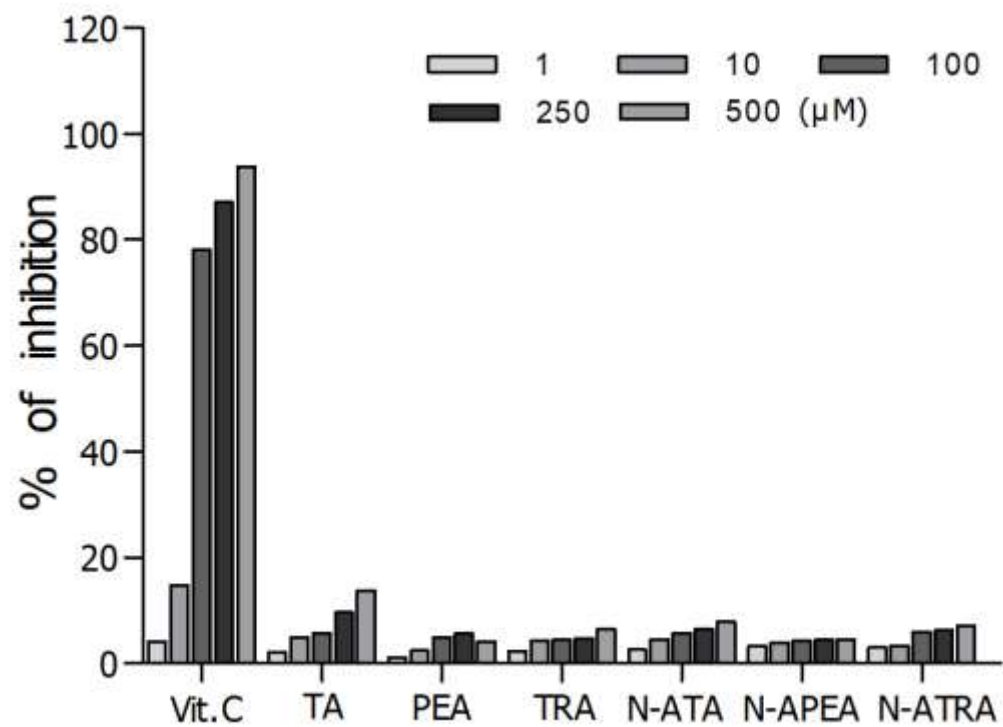

Figure S8. DPPH radical scavenging activity of the three monoamines TA, PEA, and TRA and their *N*-acetyl derivatives (Vitamin C was used as a positive control).
